# Supplementary material for: Comparison of the dietary bioavailability of copper sulphate and copper oxide nanomaterials inex vivogut sacs of rainbow trout: effects of low pH and amino acids in the lumen
Source: Royal Society of Chemistry journal article supplement (doi:10.1039/d0en00095g), 2020-01-01
Supplement: d0en00095g1.pdf [file d0en00095g1.pdf]

Comparison of the dietary bioavailability of copper sulphate and copper oxide nanomaterials  
in *ex vivo* gut sacs of rainbow trout: effects of low pH and amino acids in the lumen

David Boyle<sup>1</sup>, Nathaniel, J. Clark<sup>1</sup>, Tarryn L. Botha<sup>2</sup> & Richard D. Handy<sup>1,3\*</sup>

<sup>1</sup>School of Biological and Marine Sciences, University of Plymouth, Plymouth PL4 8AA, UK

<sup>2</sup>Water Research Group, Unit for Environmental Sciences and Management, North-West  
University, Potchefstroom 2520, South Africa

<sup>3</sup>Visiting Professor, Department of Nutrition, Cihan University-Erbil, Erbil, Kurdistan  
Region, Iraq

\*Corresponding author: Richard D. Handy

School of Biological and Marine Sciences, University of Plymouth, Plymouth PL4 8AA, UK

Tel: +44 1752 584630

[r.handy@plymouth.ac.uk](mailto:r.handy@plymouth.ac.uk)

## Supplementary Information

Supplementary Table 1. Confirming exposure of gut sacs to Cu at a concentration of 6.354 mg L<sup>-1</sup> of Cu as CuO ENMs or CuSO<sub>4</sub>. Total mass (ng) of Cu found in the luminal saline (rinse 1) and EDTA wash (rinse 2).

| Treatment         | Sample type    | Stomach     | Anterior intestine | Mid intestine | Posterior intestine |
|-------------------|----------------|-------------|--------------------|---------------|---------------------|
| Control           | Luminal saline | 33 ± 8      | 694 ± 393          | 24 ± 9        | 292 ± 174           |
|                   | EDTA wash      | 22 ± 9      | 119 ± 42           | 9 ± 3         | 49 ± 25             |
| CuSO <sub>4</sub> | Luminal saline | 4068 ± 1583 | 4117 ± 730         | 838 ± 169     | 2151 ± 768          |
|                   | EDTA wash      | 1229 ± 470  | 457 ± 69           | 161 ± 25      | 408 ± 151           |
| CuO ENMs          | Luminal saline | 6052 ± 2024 | 6121 ± 1798        | 698 ± 221     | 2460 ± 449          |
|                   | EDTA wash      | 430 ± 205   | 535 ± 273          | 154 ± 61      | 573 ± 116           |

Data are means ± SEM of  $n = 5/6$  samples. Controls were loaded with saline, only (Cu < 0.1 µg L<sup>-1</sup>).

Supplementary Table 2. Confirming exposure of gut sacs to Cu at a concentration of 6.354 mg L<sup>-1</sup> of Cu as CuO ENMs or CuSO<sub>4</sub> and in the presence or absence of 5 mM L-histidine. Total mass (ng) of Cu found in the luminal saline (rinse 1) and EDTA wash (rinse 2).

|                     | Sample type    | Control  | CuSO <sub>4</sub> | CuO ENMs   | CuSO <sub>4</sub> and histidine | CuO ENMs and histidine |
|---------------------|----------------|----------|-------------------|------------|---------------------------------|------------------------|
| Mid-intestine       | Luminal saline | 11 ± 7   | 816 ± 127         | 509 ± 72   | 1050 ± 155                      | 498 ± 103              |
|                     | EDTA wash      | 0 ± 0    | 160 ± 59          | 45 ± 21    | 145 ± 16                        | 162 ± 59               |
| Posterior-intestine | Luminal saline | 230 ± 54 | 3353 ± 444        | 3680 ± 499 | 1530 ± 278                      | 1327 ± 229             |
|                     | EDTA wash      | 23 ± 9   | 362 ± 91          | 532 ± 169  | 214 ± 68                        | 168 ± 37               |

Data are means ± SEM of  $n = 5/6$  samples. Controls were loaded with saline, only (Cu < 0.1 µg L<sup>-1</sup>).

Supplementary Table 3. Confirming exposure of gut sacs to Cu at a concentration of 6.354 mg L<sup>-1</sup> of Cu as CuO ENMs or CuSO<sub>4</sub> and in the presence or absence of 5 mM L-cysteine. Total mass (ng) of Cu found in the luminal saline (rinse 1) and EDTA wash (rinse 2).

|                     | Sample type    | Control   | CuSO <sub>4</sub> | CuO ENMs   | CuSO <sub>4</sub> and cysteine | CuO ENMs and cysteine |
|---------------------|----------------|-----------|-------------------|------------|--------------------------------|-----------------------|
| Mid-intestine       | Luminal saline | 56 ± 39   | 2317 ± 683        | 1183 ± 204 | 2288 ± 532                     | 1916 ± 508            |
|                     | EDTA wash      | 13 ± 4    | 195 ± 52          | 175 ± 20   | 189 ± 42                       | 229 ± 111             |
| Posterior-intestine | Luminal saline | 315 ± 260 | 4537 ± 1017       | 3124 ± 769 | 1853 ± 183                     | 2387 ± 599            |
|                     | EDTA wash      | 145 ± 138 | 629 ± 224         | 405 ± 54   | 393 ± 101                      | 273 ± 62              |

Data are means ± SEM of  $n = 3-5$  samples. Controls were loaded with saline, only (Cu < 0.1 µg L<sup>-1</sup>).

Supplementary Table 4. Percentage of total Cu (CuSO<sub>4</sub> or CuO ENMs) dosed in gut sacs and in the presence or absence of 5 mM L-histidine that was recovered from the luminal saline (rinse 1) and EDTA wash (rinse 2) after 4 h.

|                     | Sample type    | CuSO <sub>4</sub>           | CuO ENMs                    | CuSO <sub>4</sub> and histidine | CuO ENMs and histidine      |
|---------------------|----------------|-----------------------------|-----------------------------|---------------------------------|-----------------------------|
| Mid-intestine       | Luminal saline | 27.3 ± 3.6 <sup>abcde</sup> | 18.8 ± 2.9 <sup>abcde</sup> | 37.9 ± 4.0 <sup>cde</sup>       | 17.1 ± 3.0 <sup>abcde</sup> |
|                     | EDTA wash      | 5.7 ± 2.0 <sup>abcd</sup>   | 1.8 ± 0.8 <sup>a</sup>      | 5.5 ± 0.7 <sup>abcd</sup>       | 5.5 ± 1.6 <sup>abcd</sup>   |
| Posterior-intestine | Luminal saline | 54.1 ± 8.0 <sup>de</sup>    | 64.4 ± 5.9 <sup>e</sup>     | 29.1 ± 5.6 <sup>bcde</sup>      | 23.4 ± 4.2 <sup>abcde</sup> |
|                     | EDTA wash      | 6.0 ± 1.5 <sup>abcd</sup>   | 8.8 ± 2.1 <sup>abcde</sup>  | 4.2 ± 1.3 <sup>abc</sup>        | 3.2 ± 0.8 <sup>ab</sup>     |

Data are means ± SEM of  $n = 5/6$  samples. Measured Cu concentrations in rinses are shown in Supplementary Table 2; background Cu concentrations in controls were subtracted prior to calculations. Values with different lower case letters are significantly different (Kruskal-Wallis Test,  $p < 0.001$ ).

Supplementary Table 5. Percentage of total Cu (CuSO<sub>4</sub> or CuO ENMs) dosed in gut sacs and in the presence or absence of 5 mM L-cysteine that was recovered from the luminal saline (rinse 1) and EDTA wash (rinse 2) after 4 h.

|                      | Sample type    | CuSO <sub>4</sub>         | CuO ENMs                  | CuSO <sub>4</sub> and cysteine | CuO ENMs and cysteine     |
|----------------------|----------------|---------------------------|---------------------------|--------------------------------|---------------------------|
| Mid- intestine       | Luminal saline | 42.8 ± 11.1 <sup>ab</sup> | 37.7 ± 18.1 <sup>ab</sup> | 49.3 ± 13.3 <sup>ab</sup>      | 44.6 ± 12.7 <sup>ab</sup> |
|                      | EDTA wash      | 4.1 ± 0.6 <sup>ab</sup>   | 5.2 ± 2.4 <sup>ab</sup>   | 3.7 ± 0.8 <sup>ab</sup>        | 5.3 ± 2.8 <sup>ab</sup>   |
| Posterior- intestine | Luminal saline | 62.8 ± 9.8 <sup>a</sup>   | 43.0 ± 5.8 <sup>ab</sup>  | 23.7 ± 2.2 <sup>ab</sup>       | 37.0 ± 9.6 <sup>ab</sup>  |
|                      | EDTA wash      | 6.5 ± 1.7 <sup>ab</sup>   | 4.6 ± 1.3 <sup>ab</sup>   | 3.9 ± 1.5 <sup>b</sup>         | 2.5 ± 1.1 <sup>b</sup>    |

Data are means ± SEM of  $n = 3-5$  samples. Measured Cu concentrations in rinses are shown in Supplementary Table 3; background Cu concentrations in controls were subtracted prior to calculations. Values with different lower case letters are significantly different (Kruskal-Wallis Test,  $p < 0.001$ ).

Supplementary Table 6. Fluid flux and total Cu accumulation into the serosal compartment of gut sacs.

|                                                                                  | Control                     | CuSO <sub>4</sub>           | CuO ENMs                    | CuSO <sub>4</sub> and histidine | CuO ENMs and histidine     |
|----------------------------------------------------------------------------------|-----------------------------|-----------------------------|-----------------------------|---------------------------------|----------------------------|
| Total Cu concentration in serosal saline ( $\mu\text{g mL}^{-1} \text{g}^{-1}$ ) |                             |                             |                             |                                 |                            |
| Mid- intestine                                                                   | 0.37 ± 0.07 <sup>ab</sup>   | 0.43 ± 0.14 <sup>ab</sup>   | 0.78 ± 0.14 <sup>a</sup>    | 0.02 ± 0.01 <sup>b</sup>        | 0.23 ± 0.09 <sup>ab</sup>  |
| Posterior- intestine                                                             | 0.30 ± 0.13 <sup>ab</sup>   | 0.60 ± 0.26 <sup>ab</sup>   | 0.36 ± 0.11 <sup>ab</sup>   | 0.55 ± 0.14 <sup>ab</sup>       | 0.37 ± 0.11 <sup>ab</sup>  |
| -----                                                                            |                             |                             |                             |                                 |                            |
| Fluid flux ( $\mu\text{L g}^{-1} \text{h}^{-1}$ )                                |                             |                             |                             |                                 |                            |
| Mid- intestine                                                                   | 40.1 ± 16.3 <sup>abcd</sup> | 65.7 ± 14.7 <sup>bcd</sup>  | 61.9 ± 7.0 <sup>bcd</sup>   | 72.2 ± 10.9 <sup>cd</sup>       | 161.6 ± 92.5 <sup>d</sup>  |
| Posterior- intestine                                                             | -29.1 ± 7.9 <sup>ab</sup>   | -20.9 ± 4.6 <sup>abcd</sup> | -12.3 ± 5.3 <sup>abcd</sup> | -33.7 ± 14.6 <sup>abc</sup>     | -142.4 ± 80.3 <sup>a</sup> |

Data are means ± SEM of  $n = 5/6$  samples. Different lowercase letters indicate significant differences between treatments (Kruskal-Wallis test,  $p < 0.05$ ).

Supplementary Table 7. Fluid flux and rates of total Cu accumulation into the serosal compartment of gut sacs.

|                                                                                  | Control                      | CuSO <sub>4</sub>            | CuO ENMs                      | CuSO <sub>4</sub> and cysteine | CuO ENMs and cysteine        |
|----------------------------------------------------------------------------------|------------------------------|------------------------------|-------------------------------|--------------------------------|------------------------------|
| Total Cu concentration in serosal saline ( $\mu\text{g mL}^{-1} \text{g}^{-1}$ ) |                              |                              |                               |                                |                              |
| Mid-intestine                                                                    | 0.35 $\pm$ 0.19 <sup>a</sup> | 0.67 $\pm$ 0.67 <sup>a</sup> | 0.28 $\pm$ 0.05 <sup>a</sup>  | 0.60 $\pm$ 0.15 <sup>a</sup>   | 0.62 $\pm$ 0.18 <sup>a</sup> |
| Posterior-intestine                                                              | 0.79 $\pm$ 0.44 <sup>a</sup> | 1.03 $\pm$ 0.23 <sup>a</sup> | 0.44 $\pm$ 0.12 <sup>a</sup>  | 1.03 $\pm$ 0.30 <sup>a</sup>   | 0.78 $\pm$ 0.15 <sup>a</sup> |
| -----                                                                            |                              |                              |                               |                                |                              |
| Fluid flux ( $\mu\text{L g}^{-1} \text{h}^{-1}$ )                                |                              |                              |                               |                                |                              |
| Mid-intestine                                                                    | -4.0 $\pm$ 9.9 <sup>ab</sup> | 9.7 $\pm$ 11.1 <sup>ab</sup> | 13.9 $\pm$ 13.5 <sup>ab</sup> | 13.8 $\pm$ 4.8 <sup>ab</sup>   | 83.5 $\pm$ 94.7 <sup>a</sup> |
| Posterior-intestine                                                              | 1.2 $\pm$ 9.6 <sup>ab</sup>  | -10.8 $\pm$ 4.9 <sup>b</sup> | -3.6 $\pm$ 4.7 <sup>ab</sup>  | -3.9 $\pm$ 3.8 <sup>ab</sup>   | -8.5 $\pm$ 8.2 <sup>b</sup>  |

Data are means  $\pm$  SEM of  $n = 3-5$  samples. Different lowercase letters indicate significant differences between treatments (Kruskal-Wallis test,  $p < 0.05$ ).

Supplementary Table 8. Partitioning of Cu throughout gut sacs exposed to CuSO<sub>4</sub> or CuO ENMs and in the presence and absence of 5 mM L-histidine expressed as a percentage of the Cu dose at the start of the 4 h incubation.

|                     |                | CuSO <sub>4</sub>             | CuO ENMs                      | CuSO <sub>4</sub> and histidine | CuO ENMs and histidine        |
|---------------------|----------------|-------------------------------|-------------------------------|---------------------------------|-------------------------------|
| Mid-intestine       | Mucosa         | 10.0 $\pm$ 2.9 <sup>bcd</sup> | 14.2 $\pm$ 3.8 <sup>cd</sup>  | 14.4 $\pm$ 2.8 <sup>d</sup>     | 6.2 $\pm$ 1.5 <sup>abcd</sup> |
|                     | Muscularis     | 2.4 $\pm$ 0.6 <sup>abcd</sup> | 0.7 $\pm$ 0.4 <sup>abcd</sup> | 5.1 $\pm$ 1.2 <sup>abcd</sup>   | 0.6 $\pm$ 0.3 <sup>abcd</sup> |
|                     | Serosal saline | 0.1 $\pm$ 0.1 <sup>abc</sup>  | 0.3 $\pm$ 0.1 <sup>abcd</sup> | 0 $\pm$ 0 <sup>a</sup>          | 0 $\pm$ 0 <sup>a</sup>        |
| Posterior-intestine | Mucosa         | 11.0 $\pm$ 3.3 <sup>bcd</sup> | 11.1 $\pm$ 3.0 <sup>bcd</sup> | 17.8 $\pm$ 5.9 <sup>d</sup>     | 7.4 $\pm$ 1.9 <sup>bcd</sup>  |
|                     | Muscularis     | 3.5 $\pm$ 0.2 <sup>abcd</sup> | 0.8 $\pm$ 0.2 <sup>abcd</sup> | 6.5 $\pm$ 2.6 <sup>abcd</sup>   | 0.6 $\pm$ 0.2 <sup>abcd</sup> |
|                     | Serosal saline | 0.3 $\pm$ 0.2 <sup>abcd</sup> | 0.1 $\pm$ 0.1 <sup>ab</sup>   | 0.4 $\pm$ 0.3 <sup>abcd</sup>   | 0.1 $\pm$ 0.1 <sup>ab</sup>   |

Data are means  $\pm$  SEM of  $n = 5/6$  samples. Background Cu concentrations in controls are shown in Figure 3 and were subtracted prior to calculations. Values with different lower case letters are significantly different (Kruskal-Wallis Test,  $p < 0.001$ ).

Supplementary Table 9. Partitioning of Cu throughout gut sacs exposed to CuSO<sub>4</sub> or CuO ENMs and in the presence and absence of 5 mM L-cysteine expressed as a percentage of the Cu dose at the start of the 4 h incubation.

|                     |                | CuSO <sub>4</sub>         | CuO ENMs                  | CuSO <sub>4</sub> and cysteine | CuO ENMs and cysteine     |
|---------------------|----------------|---------------------------|---------------------------|--------------------------------|---------------------------|
| Mid-intestine       | Mucosa         | 3.2 ± 0.6 <sup>abcd</sup> | 2.1 ± 1.8 <sup>abcd</sup> | 3.5 ± 1.3 <sup>abcd</sup>      | 4.1 ± 1.4 <sup>abcd</sup> |
|                     | Muscularis     | 1.2 ± 0.4 <sup>abcd</sup> | 1.5 ± 1.0 <sup>abcd</sup> | 3.4 ± 0.8 <sup>abcd</sup>      | 3.5 ± 0.3 <sup>abcd</sup> |
|                     | Serosal saline | 0.3 ± 0.1 <sup>abc</sup>  | 0.1 ± 0.1 <sup>ab</sup>   | 0.2 ± 0.1 <sup>ab</sup>        | 0.3 ± 0.1 <sup>abc</sup>  |
| Posterior-intestine | Mucosa         | 20.8 ± 1.2 <sup>d</sup>   | 13.1 ± 5.2 <sup>bcd</sup> | 16.1 ± 2.6 <sup>cd</sup>       | 14.9 ± 1.2 <sup>cd</sup>  |
|                     | Muscularis     | 6.7 ± 0.7 <sup>abcd</sup> | 5.6 ± 1.7 <sup>abcd</sup> | 8.6 ± 2.0 <sup>abcd</sup>      | 5.3 ± 1.2 <sup>abcd</sup> |
|                     | Serosal saline | 0.2 ± 0.2 <sup>ab</sup>   | 0.1 ± 0.1 <sup>a</sup>    | 0.2 ± 0.1 <sup>ab</sup>        | 0.1 ± 0.1 <sup>ab</sup>   |

Data are means ± SEM of  $n = 3-5$  samples. Background Cu concentrations in controls are shown in Figure 3 and were subtracted prior to calculations. Values with different lower case letters are significantly different (Kruskal-Wallis Test,  $p < 0.001$ ).

Supplementary Table 10. Net uptake rate (nmol cm<sup>-2</sup> h<sup>-1</sup>) for Cu (as CuSO<sub>4</sub>) in trout gut sacs.

|            | Stomach       | Anterior intestine | Mid intestine | Posterior intestine |
|------------|---------------|--------------------|---------------|---------------------|
| Mucosa     | 0.274 ± 0.094 | 0.134 ± 0.060      | 0.354 ± 0.092 | 0.446 ± 0.128       |
| Muscularis | 0.097 ± 0.052 | 0.120 ± 0.074      | 0.088 ± 0.024 | 0.238 ± 0.080       |

Data are means ± SEM of  $n = 6$  samples.
